# Supplementary material for: UBR5 regulates proliferation and radiosensitivity in human laryngeal carcinoma via the p38/MAPK signaling pathway
Source: PubMed Central journal article supplement — Oncol Rep. 2020 May 21;44(2):685–97. doi: 10.3892/or.2020.7620 (PMC7336417; doi:10.3892/or.2020.7620), 2020-05-21

Figure S1. Cell cycle analysis of vector-transfected laryngeal carcinoma UBR5-overexpressing cells and UBR5-overexpressing cells treated with SB203580.

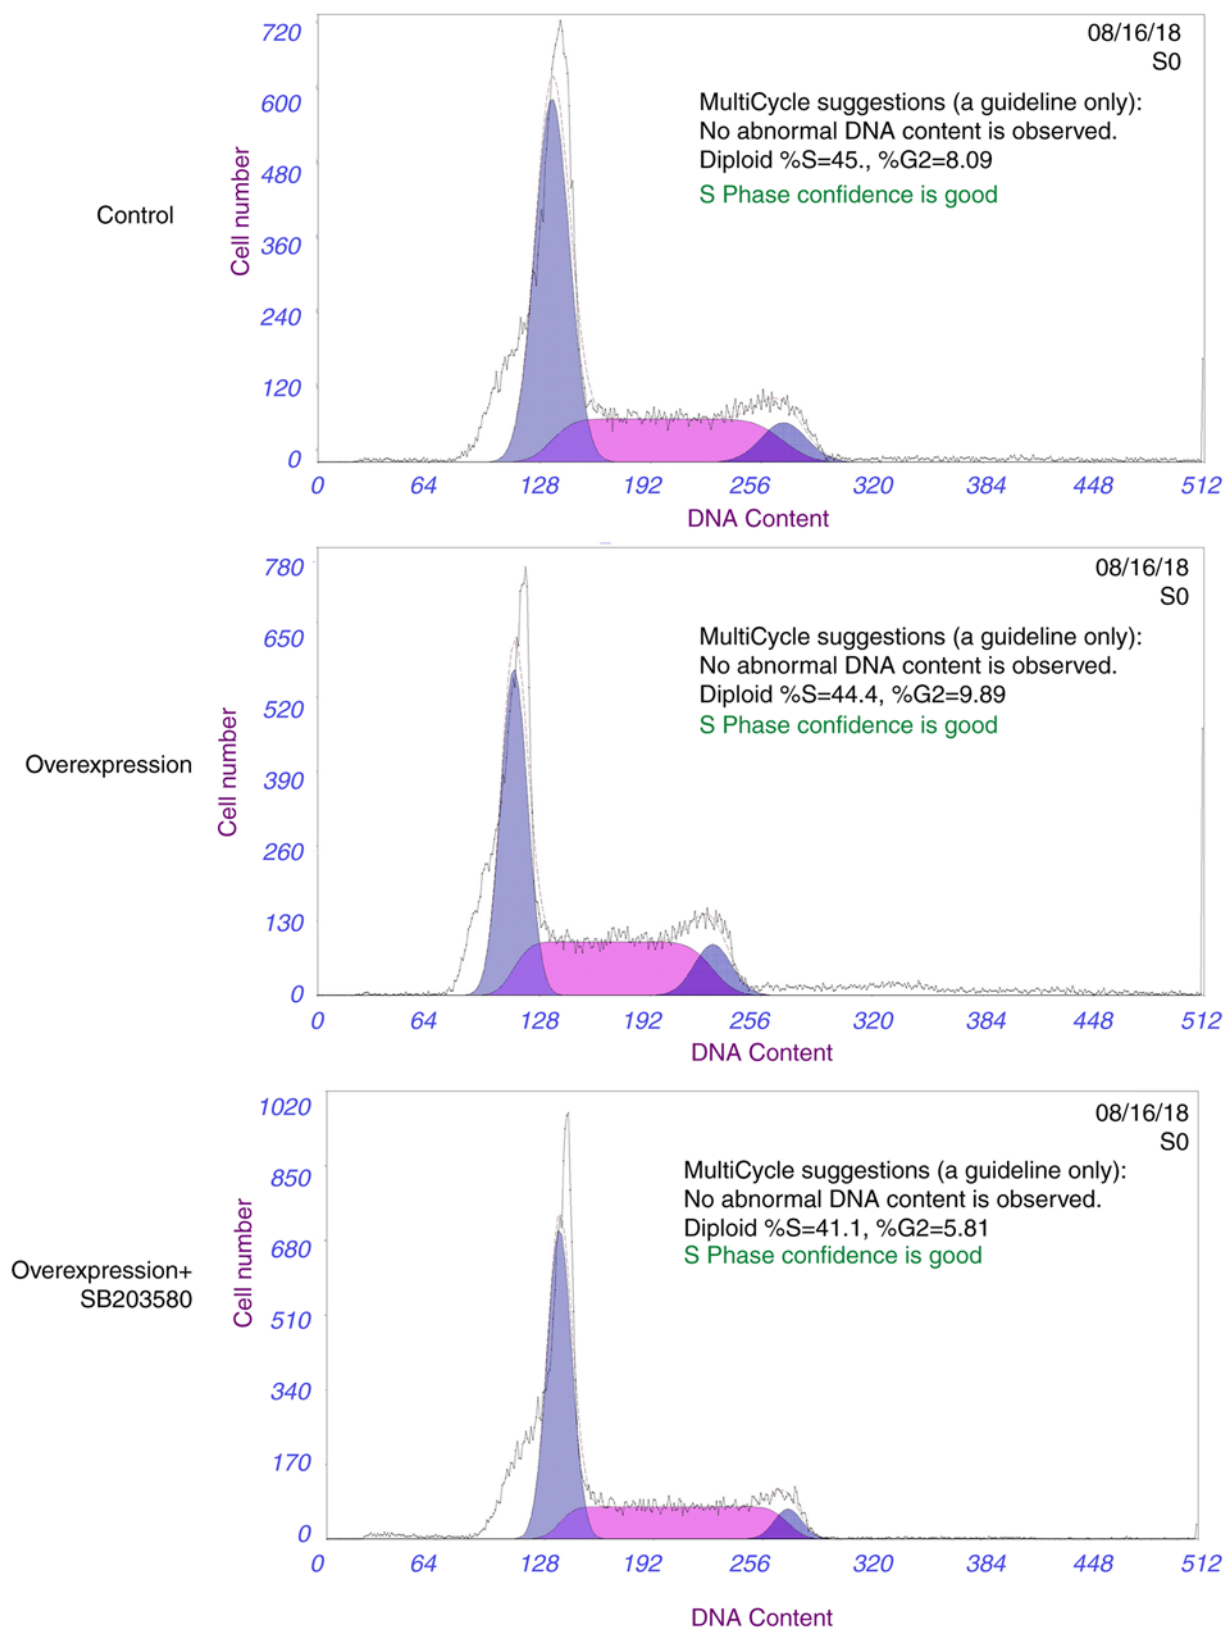

Supplement: Supplementary_Data.pdf [file Supplementary_Data.pdf]
